# Supplementary material for: Humoral Response to Microbial Biomarkers in Rheumatoid Arthritis Patients
Source: MDPI journal article supplement (doi:10.3390/jcm10215153), 2021-11-02
Supplement: s1 [file s1]

**Table S1.** Spearman correlation analysis (r and *p* values) performed between OD values obtained by ELISA test and RA features.

|                     | Anti-<br>MAP4027 | Anti-<br>MAP4027* | Anti-<br>RgpA | Anti-<br>RgpA* | Anti-<br>Kpg | Anti-<br>Kpg* | Anti-<br>LtxA1 | Anti-<br>LtxA1* | Anti-<br>LtxA2 | Anti-<br>LtxA2* | Anti-<br>EBNA1 | Anti-<br>EBNA1* | Anti-<br>BOLF | Anti-<br>BOLF* | Anti-<br>HERVW | Anti-<br>HERVW* |
|---------------------|------------------|-------------------|---------------|----------------|--------------|---------------|----------------|-----------------|----------------|-----------------|----------------|-----------------|---------------|----------------|----------------|-----------------|
| Age                 | -0.203           | -0.0202           | -0.092        | -0.021         | 0.087        | 0.121         | 0.147          | 0.110           | 0.202          | 0.131           | -0.172         | -0.147          | 0.116         | 0.170          | -0.165         | -0.082          |
|                     | 0.064            | 0.065             | 0.268         | 0.794          | 0.297        | 0.146         | 0.079          | 0.186           | 0.095          | 0.115           | 0.088          | 0.077           | 0.165         | 0.050          | 0.057          | 0.328           |
| Sex                 | -0.057           | -0.094            | -0.074        | -0.080         | -0.027       | -0.065        | 0.017          | 0.057           | 0.014          | 0.051           | -0.140         | -0.150          | -0.124        | -0.106         | -0.005         | 0.003           |
|                     | 0.484            | 0.255             | 0.367         | 0.329          | 0.741        | 0.432         | 0.832          | 0.488           | 0.861          | 0.533           | 0.089          | 0.067           | 0.131         | 0.197          | 0.946          | 0.970           |
| Disease<br>duration | 0.0001           | 0.056             | 0.094         | 0.029          | 0.134        | 0.064         | 0.170          | 0.106           | 0.124          | 0.137           | -0.015         | -0.053          | 0.074         | 0.061          | -0.002         | 0.001           |
|                     | 0.999            | 0.494             | 0.253         | 0.720          | 0.103        | 0.441         | 0.039          | 0.201           | 0.132          | 0.096           | 0.856          | 0.523           | 0.372         | 0.459          | 0.977          | 0.988           |
| ACPA                | -0.058           | -0.026            | -0.055        | -0.020         | 0.046        | 0.019         | 0.068          | 0.112           | 0.097          | 0.142           | -0.108         | -0.140          | 0.028         | 0.030          | -0.046         | -0.033          |
|                     | 0.503            | 0.764             | 0.524         | 0.819          | 0.597        | 0.825         | 0.435          | 0.198           | 0.266          | 0.102           | 0.214          | 0.108           | 0.743         | 0.732          | 0.599          | 0.703           |
| RF                  | 0.065            | 0.041             | 0.0700        | 0.064          | 0.125        | 0.104         | 0.178          | 0.177           | 0.178          | 0.149           | -0.002         | -0.020          | 0.108         | 0.021          | 0.079          | 0.062           |
|                     | 0.447            | 0.630             | 0.417         | 0.453          | 0.146        | 0.227         | 0.038          | 0.038           | 0.037          | 0.083           | 0.978          | 0.815           | 0.206         | 0.803          | 0.355          | 0.469           |
| DAS28               | 0.087            | 0.114             | 0.020         | 0.030          | -0.043       | -0.094        | 0.019          | 0.011           | -0.068         | -0.042          | 0.008          | 0.052           | -0.091        | -0.085         | 0.131          | 0.153           |
|                     | 0.301            | 0.177             | 0.807         | 0.717          | 0.606        | 0.266         | 0.818          | 0.894           | 0.422          | 0.614           | 0.921          | 0.533           | 0.279         | 0.316          | 0.119          | 0.069           |
| CDAI                | 0.072            | 0.143             | -0.048        | -0.006         | -0.102       | -0.156        | -0.075         | -0.112          | -0.090         | -0.028          | 0.011          | 0.092           | -0.133        | -0.0108        | 0.058          | 0.059           |
|                     | 0.385            | 0.083             | 0.558         | 0.934          | 0.215        | 0.058         | 0.366          | 0.173           | 0.276          | 0.734           | 0.888          | 0.265           | 0.106         | 0.189          | 0.485          | 0.471           |
| ESR                 | 0.078            | 0.039             | 0.055         | 0.010          | -0.045       | -0.088        | 0.0930         | 0.0929          | -0.055         | -0.024          | 0.063          | 0.015           | 0.013         | -0.011         | 0.117          | 0.183           |
|                     | 0.355            | 0.636             | 0.514         | 0.904          | 0.587        | 0.292         | 0.272          | 0.271           | 0.508          | 0.770           | 0.451          | 0.858           | 0.869         | 0.890          | 0.162          | 0.029           |
| CRP                 | -0.056           | -0.071            | 0.008         | -0.062         | -0.004       | -0.042        | -0.055         | -0.038          | -0.072         | -0.045          | -0.033         | -0.050          | -0.008        | -0.013         | 0.090          | 0.145           |
|                     | 0.504            | 0.395             | 0.916         | 0.457          | 0.960        | 0.611         | 0.512          | 0.651           | 0.386          | 0.589           | 0.689          | 0.547           | 0.924         | 0.870          | 0.278          | 0.082           |
| Steroid             | 0.067            | 0.038             | 0.069         | -0.012         | 0.035        | 0.071         | 0.122          | 0.056           | 0.110          | 0.041           | 0.032          | 0.056           | -0.122        | -0.099         | 0.057          | -0.040          |
|                     | 0.412            | 0.639             | 0.400         | 0.881          | 0.667        | 0.386         | 0.140          | 0.498           | 0.180          | 0.620           | 0.691          | 0.491           | 0.136         | 0.227          | 0.491          | 0.629           |
| DMARD               | -0.031           | -0.020            | -0.000        | -0.044         | 0.108        | 0.0640        | 0.117          | 0.151           | 0.016          | 0.005           | 0.013          | -0.025          | 0.060         | 0.145          | -0.016         | -0.003          |
|                     | 0.705            | 0.809             | 0.998         | 0.589          | 0.189        | 0.439         | 0.156          | 0.065           | 0.843          | 0.947           | 0.870          | 0.758           | 0.465         | 0.077          | 0.840          | 0.971           |
| Methotrexate        | 0.009            | -0.032            | 0.060         | 0.029          | 0.091        | 0.066         | 0.105          | 0.081           | 0.093          | 0.059           | 0.143          | 0.083           | 0.123         | 0.212          | 0.081          | 0.111           |
|                     | 0.909            | 0.693             | 0.466         | 0.725          | 0.270        | 0.424         | 0.203          | 0.324           | 0.258          | 0.472           | 0.083          | 0.317           | 0.135         | 0.009          | 0.325          | 0.180           |
| TNFi                | 0.018            | -0.011            | 0.123         | 0.139          | 0.0904       | 0.133         | 0.034          | 0.042           | 0.043          | 0.108           | 0.105          | 0.064           | 0.154         | 0.083          | 0.074          | 0.084           |
|                     | 0.821            | 0.886             | 0.134         | 0.090          | 0.274        | 0.107         | 0.677          | 0.608           | 0.602          | 0.189           | 0.201          | 0.437           | 0.061         | 0.313          | 0.365          | 0.308           |
| Abatacept           | -0.076           | -0.078            | -0.063        | -0.052         | -0.051       | -0.003        | -0.043         | -0.082          | -0.107         | -0.0980         | -0.085         | -0.107          | -0.076        | -0.058         | -0.069         | -0.033          |
|                     | 0.353            | 0.345             | 0.441         | 0.529          | 0.532        | 0.965         | 0.598          | 0.316           | 0.193          | 0.235           | 0.299          | 0.192           | 0.356         | 0.483          | 0.400          | 0.689           |
| Tocilizumab         | 0.008            | 0.036             | 0.075         | 0.143          | -0.079       | -0.0159       | -0.008         | 0.002           | 0.003          | -0.024          | 0.071          | 0.113           | -0.050        | -0.072         | 0.061          | -0.046          |
|                     | 0.921            | 0.656             | 0.361         | 0.082          | 0.339        | 0.848         | 0.917          | 0.976           | 0.963          | 0.771           | 0.386          | 0.169           | 0.546         | 0.383          | 0.495          | 0.577           |

*r* and *p* values obtained from Spearman correlation analysis performed between OD values obtained by ELISA test for different peptides and RA features. Significant values are marked in red. ACPA, anti-citrullinated peptide antibodies; RF, rheumatoid factor; DAS28, disease activity score 28 joints; CDAI, clinical disease activity index; ESR, erythrocyte sedimentation rate, mm/h; CRP, C-reactive protein concentrations, mg/dL; DMARDs, synthetic disease-modifying anti-rheumatic drugs; TNFi, tumor necrosis factor inhibitors. \*, OD values above cut-off values (Positive for peptide).
